# Supplementary material
Source: MDPI journal article supplement (https://www.mdpi.com/2079-6412/13/2/358)
Supplement: s1 [file s1]

# Supplementary Materials: Graphitic Layered Structures Enhancing TiNT Catalyst Photo-Electrochemical Behaviour

Rosalba Passalacqua <sup>1,2,\*</sup>, Salvatore Abate <sup>1,2</sup>, Federica De Luca <sup>1</sup>, Siglinda Perathoner <sup>1,2</sup> and Gabriele Centi <sup>1,2</sup>

<sup>1</sup> Department of Chemical, Biological, Pharmaceutical and Environmental Sciences (ChiBioFarAm) University of Messina, 98166 Messina, Italy

<sup>2</sup> ERIC aisbl & INSTM CASPE (Lab. of Catalysis for Sustainable Production & Energy), University of Messina, 98166 Messina, Italy

\* Correspondence: rpassalacqua@unime.it

For the estimation of the optical band gap ( $E_g$ ), the relation proposed by Tauc was used:

$$(\alpha \cdot hv)^{1/n} = A(hv - E_g) \quad (1)$$

Modified as follow for diffuse reflectance spectra

$$(F(R_\infty) \cdot hv)^{1/n} = A(hv - E_g) \quad (2)$$

The Kubelka-Munk functions were modelled assuming an indirect ( $n=2$ ) or direct ( $n=1/2$ ) transition by plotting  $(F(R_\infty) \cdot E)^{1/n}$  as a function of  $hv$ , the energy of incident photons. The intercept on the abscissa of the  $(F(R_\infty) \cdot E)^{1/n}$  vs.  $E$  gave the optical absorption edge energy value.

**Citation:** Passalacqua, R.; Abate, S.; De Luca, F.; Perathoner, S.; Centi, G. Graphitic Layered Structures Enhancing TiNT Catalyst Photo-Electrochemical Behaviour. *Coatings* **2023**, *13*, 358. <https://doi.org/10.3390/coatings13020358>

Academic Editor: Emerson Coy

Received: 24 December 2022

Revised: 24 January 2023

Accepted: 1 February 2023

Published: 4 February 2023

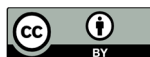

**Copyright:** © 2023 by the authors. Licensee MDPI, Basel, Switzerland. This article is an open access article distributed under the terms and conditions of the Creative Commons Attribution (CC BY) license (<https://creativecommons.org/licenses/by/4.0/>).

**Table S1.** Estimation of  $E_g$  with Tauc's plot for the investigated composites, TiNT substrate, and the M24 and MU24 powders. The fitting of the data according to a direct or indirect transition is reported.

| Sample   | Direct Transition $n=1/2$                                                           | Indirect $n=2$                                                                        |
|----------|-------------------------------------------------------------------------------------|---------------------------------------------------------------------------------------|
| TiNT     | 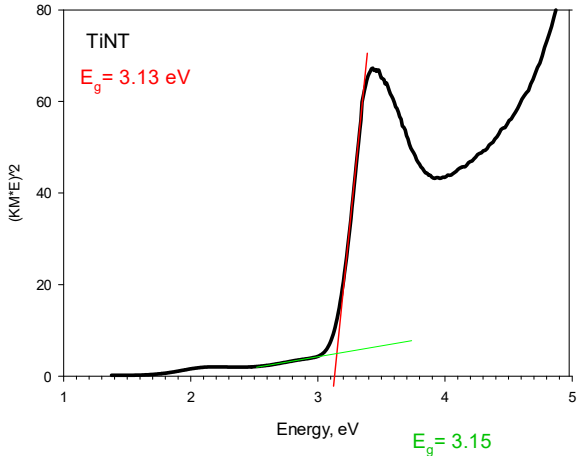   |     |
| TiNT-M6  |   |   |
| TiNT-M12 |  |  |

TiNT-M18

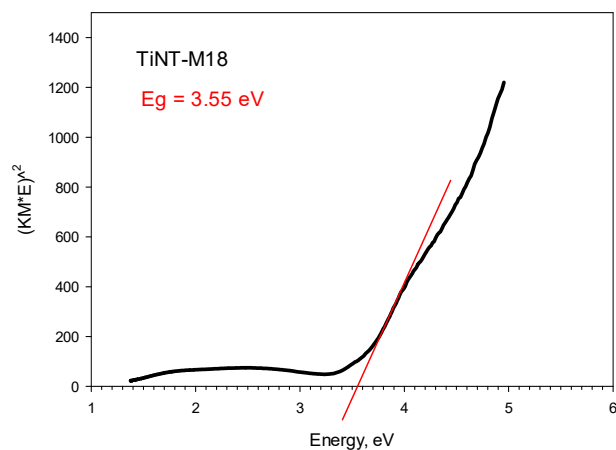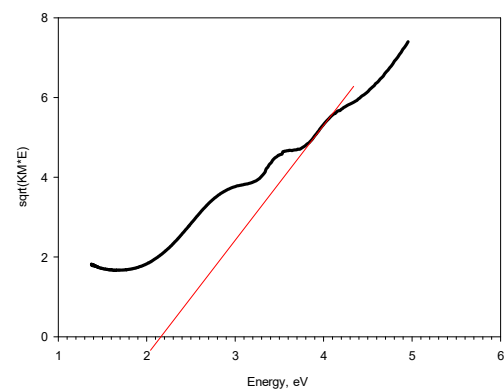

TiNT-M24

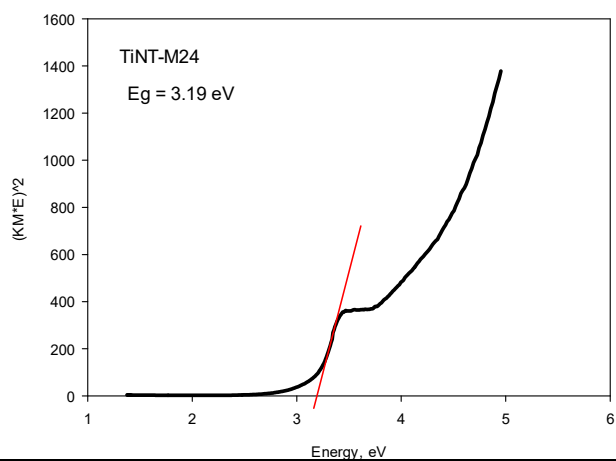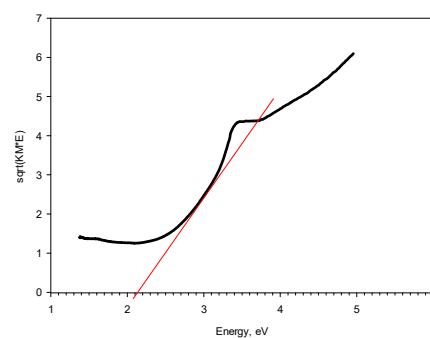

M24

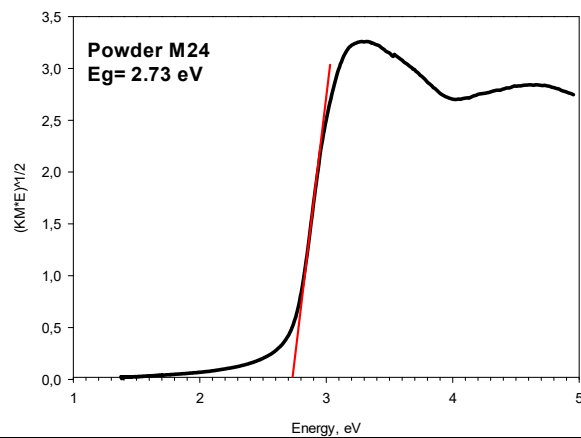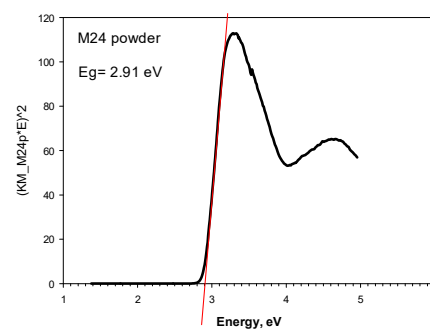

TiNT-U6

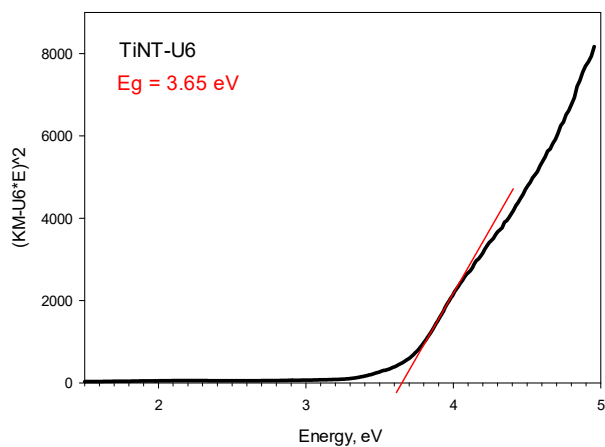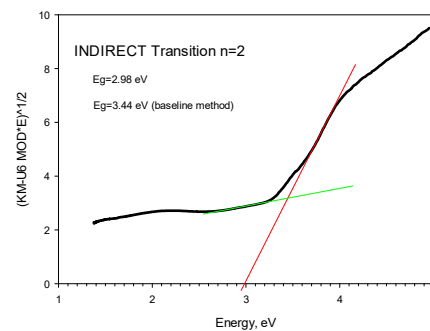

TiNT-U12

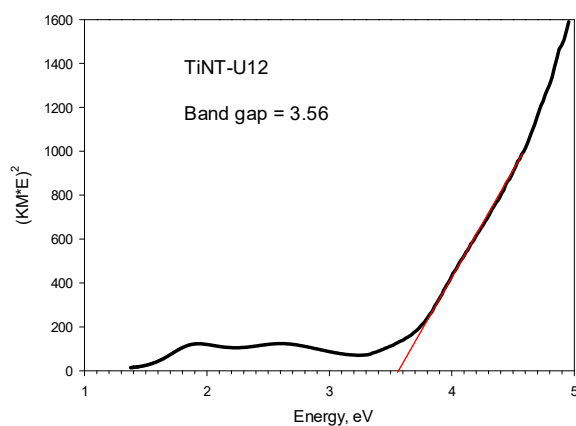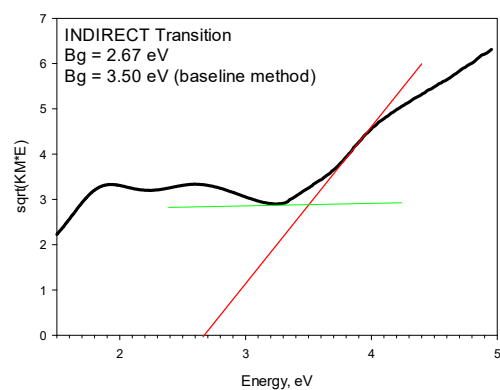

TiNT-U18

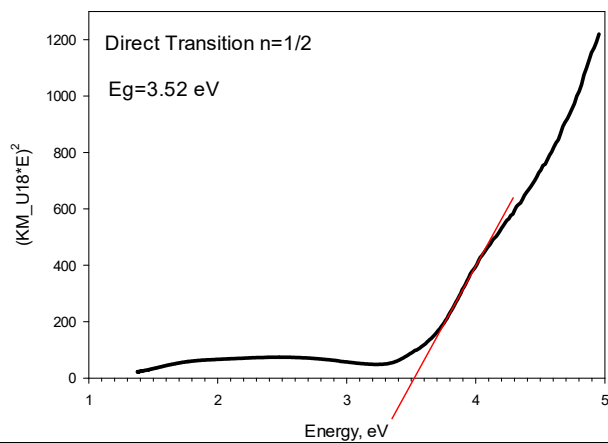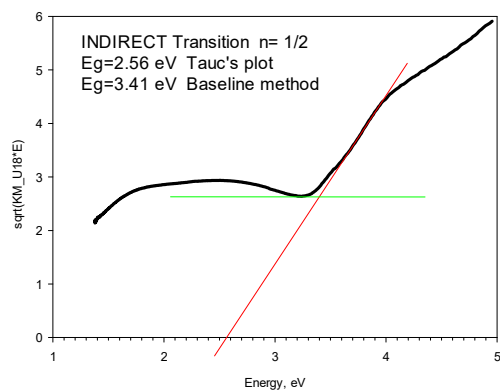

TiNT-U24

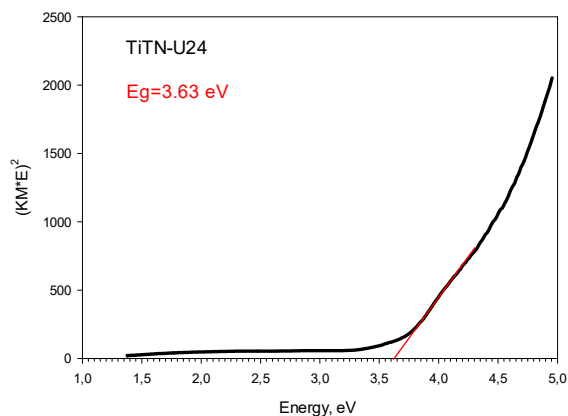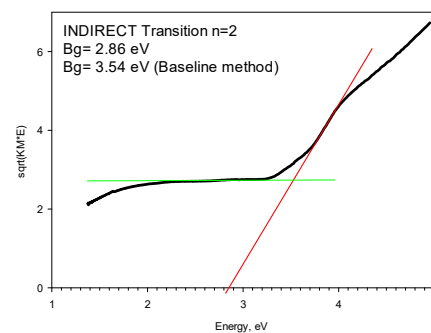

TiNT-MU6

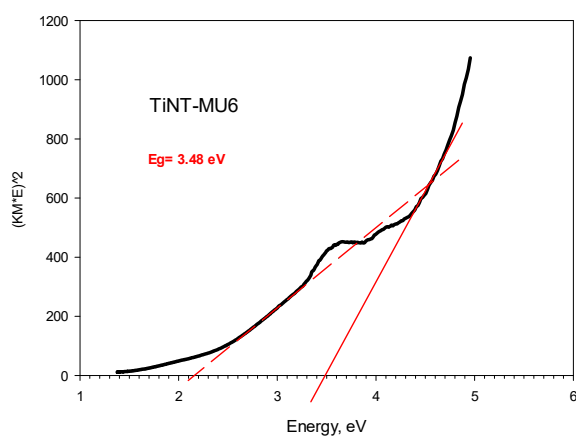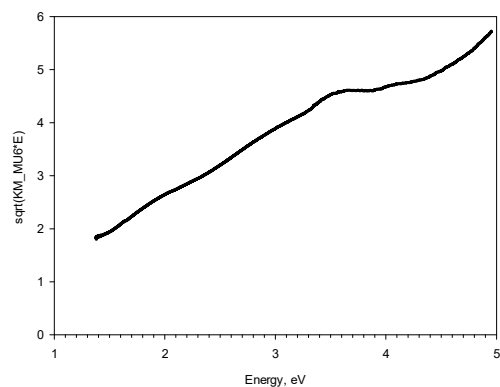

TiNT-MU12

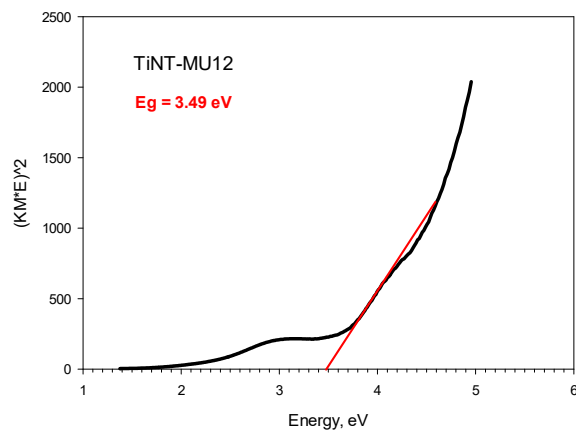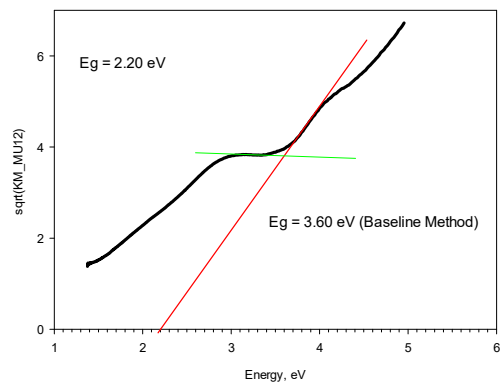

TiNT-MU18

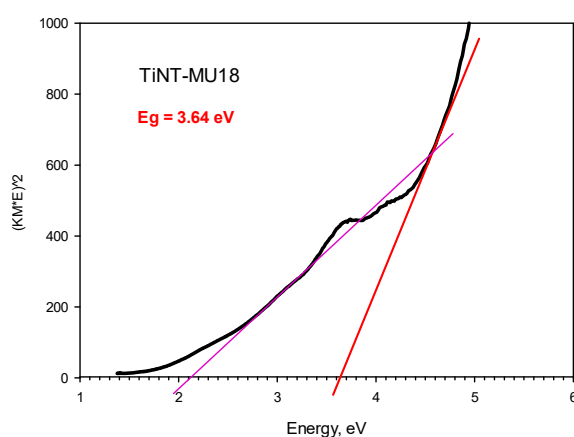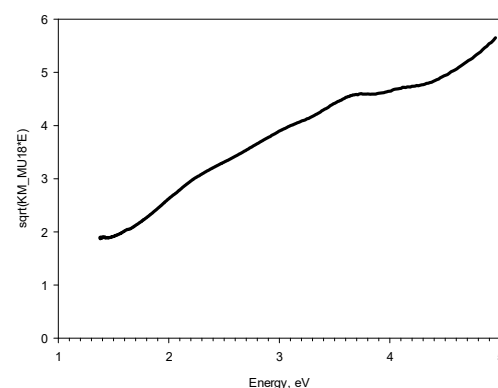

TiNT-MU24

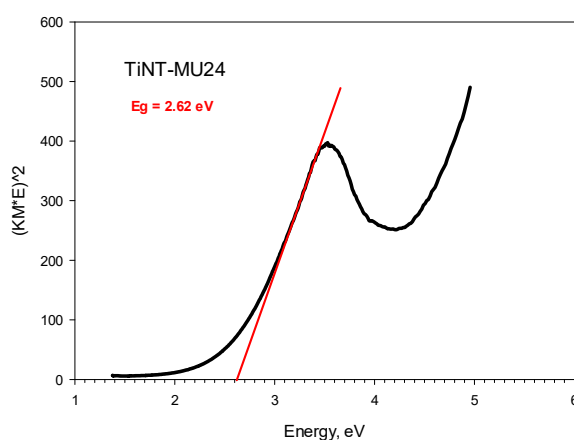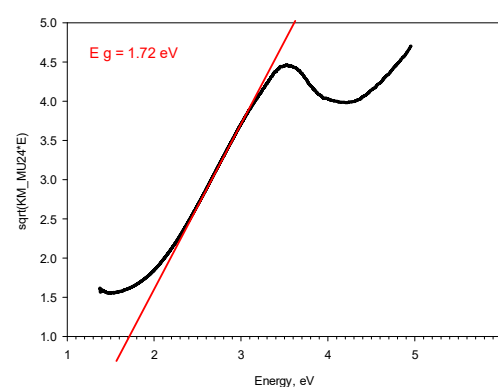

MU24

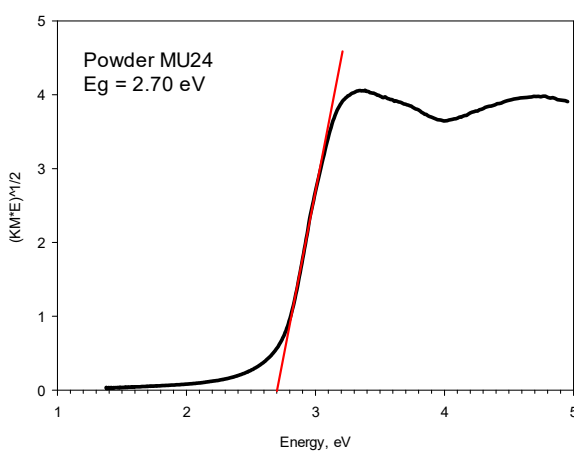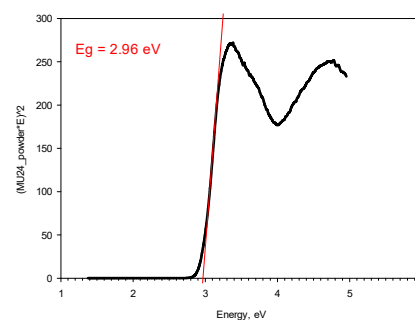

## References

1. Tauc, J.; Grigorovici, R.; Vancu, A. Optical Properties And Electronic Structure of Amorphous Germanium. *Phys. Status Solidi B* **1966**, *15*, 627–637. <https://doi.org/10.1002/pssb.19660150224>
2. Małucha, P.; Pacia, M.; Macyk, W. How To Correctly Determine the Band Gap Energy of Modified Semiconductor Photocatalysts Based on UV–Vis Spectra. *J. Phys. Chem. Lett.* **2018**, *9*, 6814–6817. <https://dx.doi.org/10.1021/acs.jpcllett.8b02892>
